# Supplementary material for: Control of chironomid larvae growth and inactivation mechanisms by UV/ClO 2 : efficacy and pathways
Source: Royal Society of Chemistry journal article supplement (doi:10.1039/d5ew00863h), 2025-12-23
Supplement: d5ew00863h18.pdf [file d5ew00863h18.pdf]

**Table S4.** Inactivation number and synergy of combined system inactivating chironomid larvae under different UV irradiation durations

| Inactivation Method    | Inactivation Count at 8 h (log) | S <sub>n</sub> |
|------------------------|---------------------------------|----------------|
| UV alone               | 0.10                            | -              |
| ClO <sub>2</sub> alone | 0.47                            | -              |
| 2 h irradiation        | 0.57                            | 1.006>1.0      |
| 4 h irradiation        | 0.71                            | 1.256>1.0      |
| 6 h irradiation        | 0.85                            | 1.510>1.0      |
| 8 h irradiation        | 1.00                            | 1.698>1.0      |
