# Supplementary figures and images for: Control of chironomid larvae growth and inactivation mechanisms by UV/ClO 2 : efficacy and pathways
Source: Royal Society of Chemistry journal article supplement (doi:10.1039/d5ew00863h), 2025-12-23

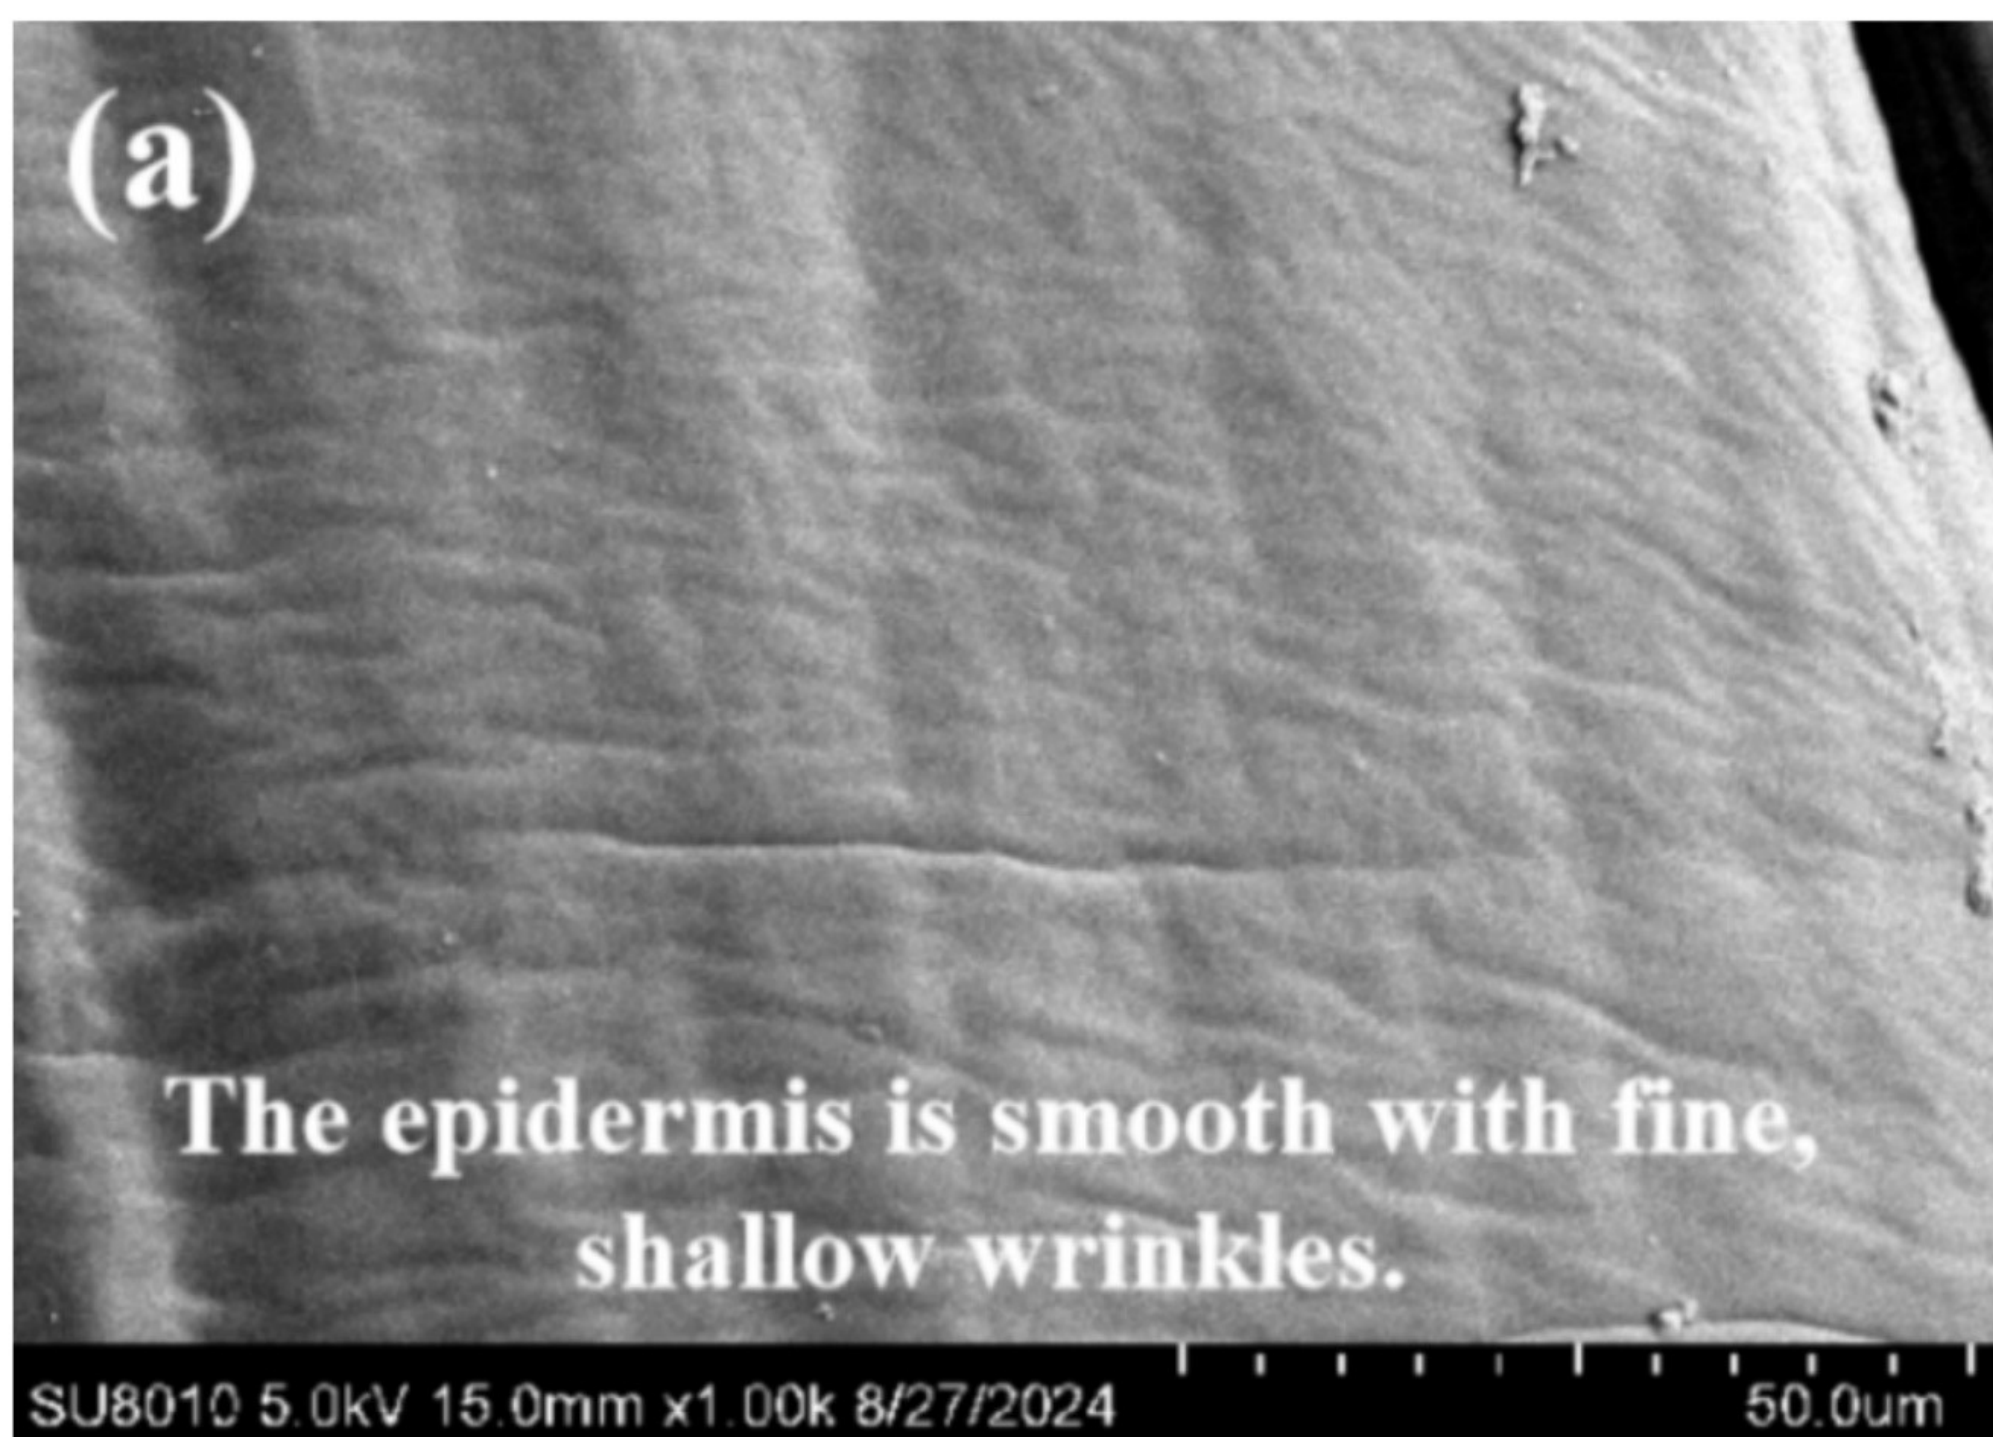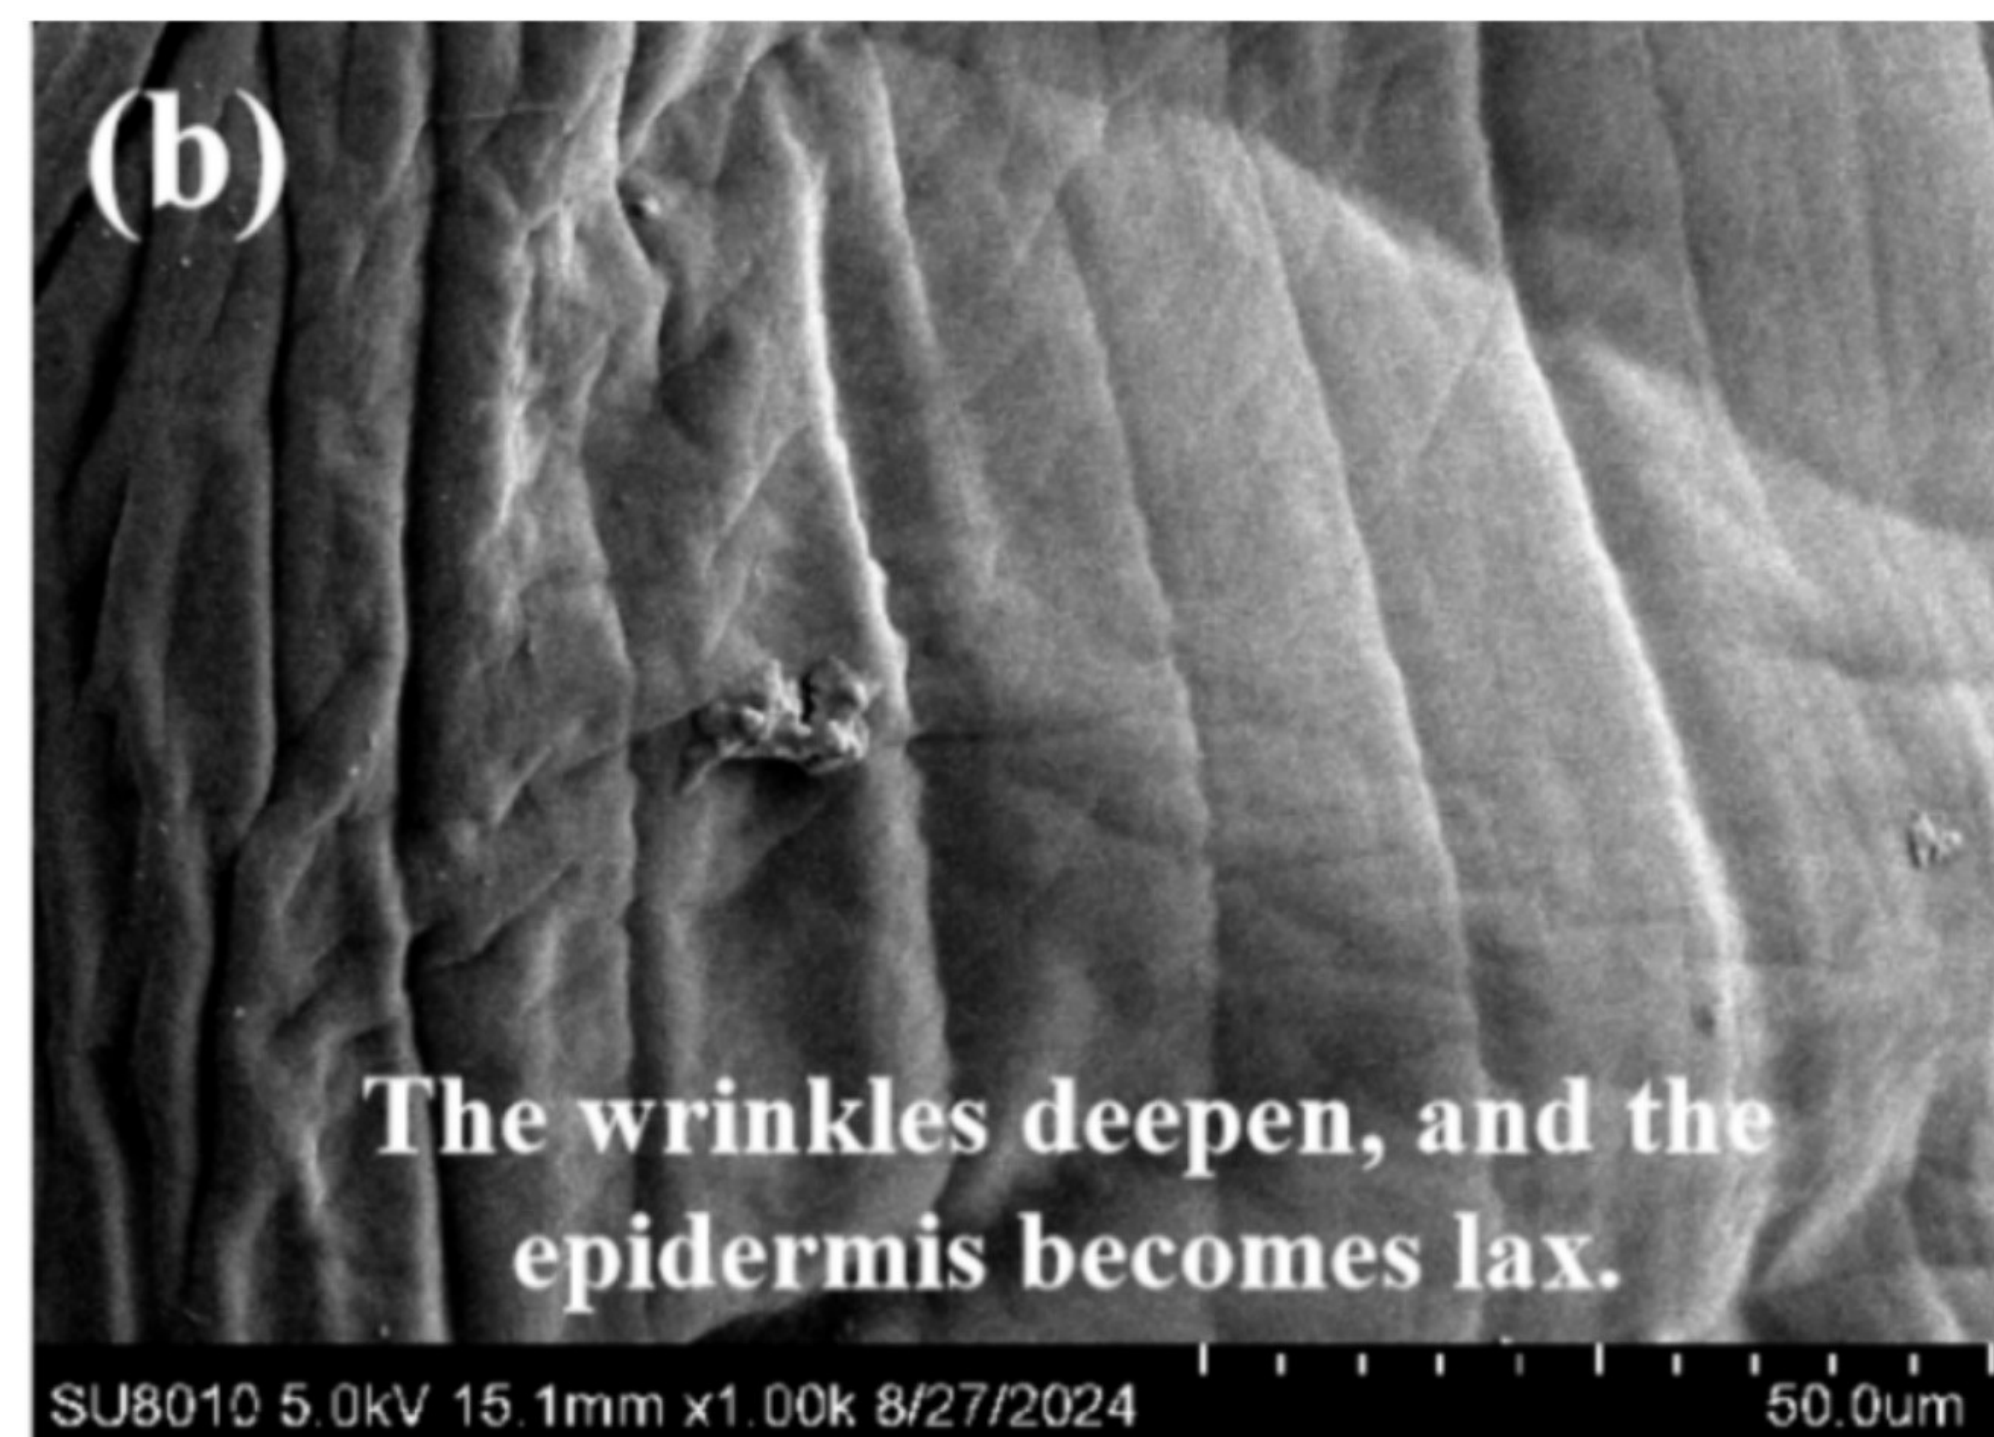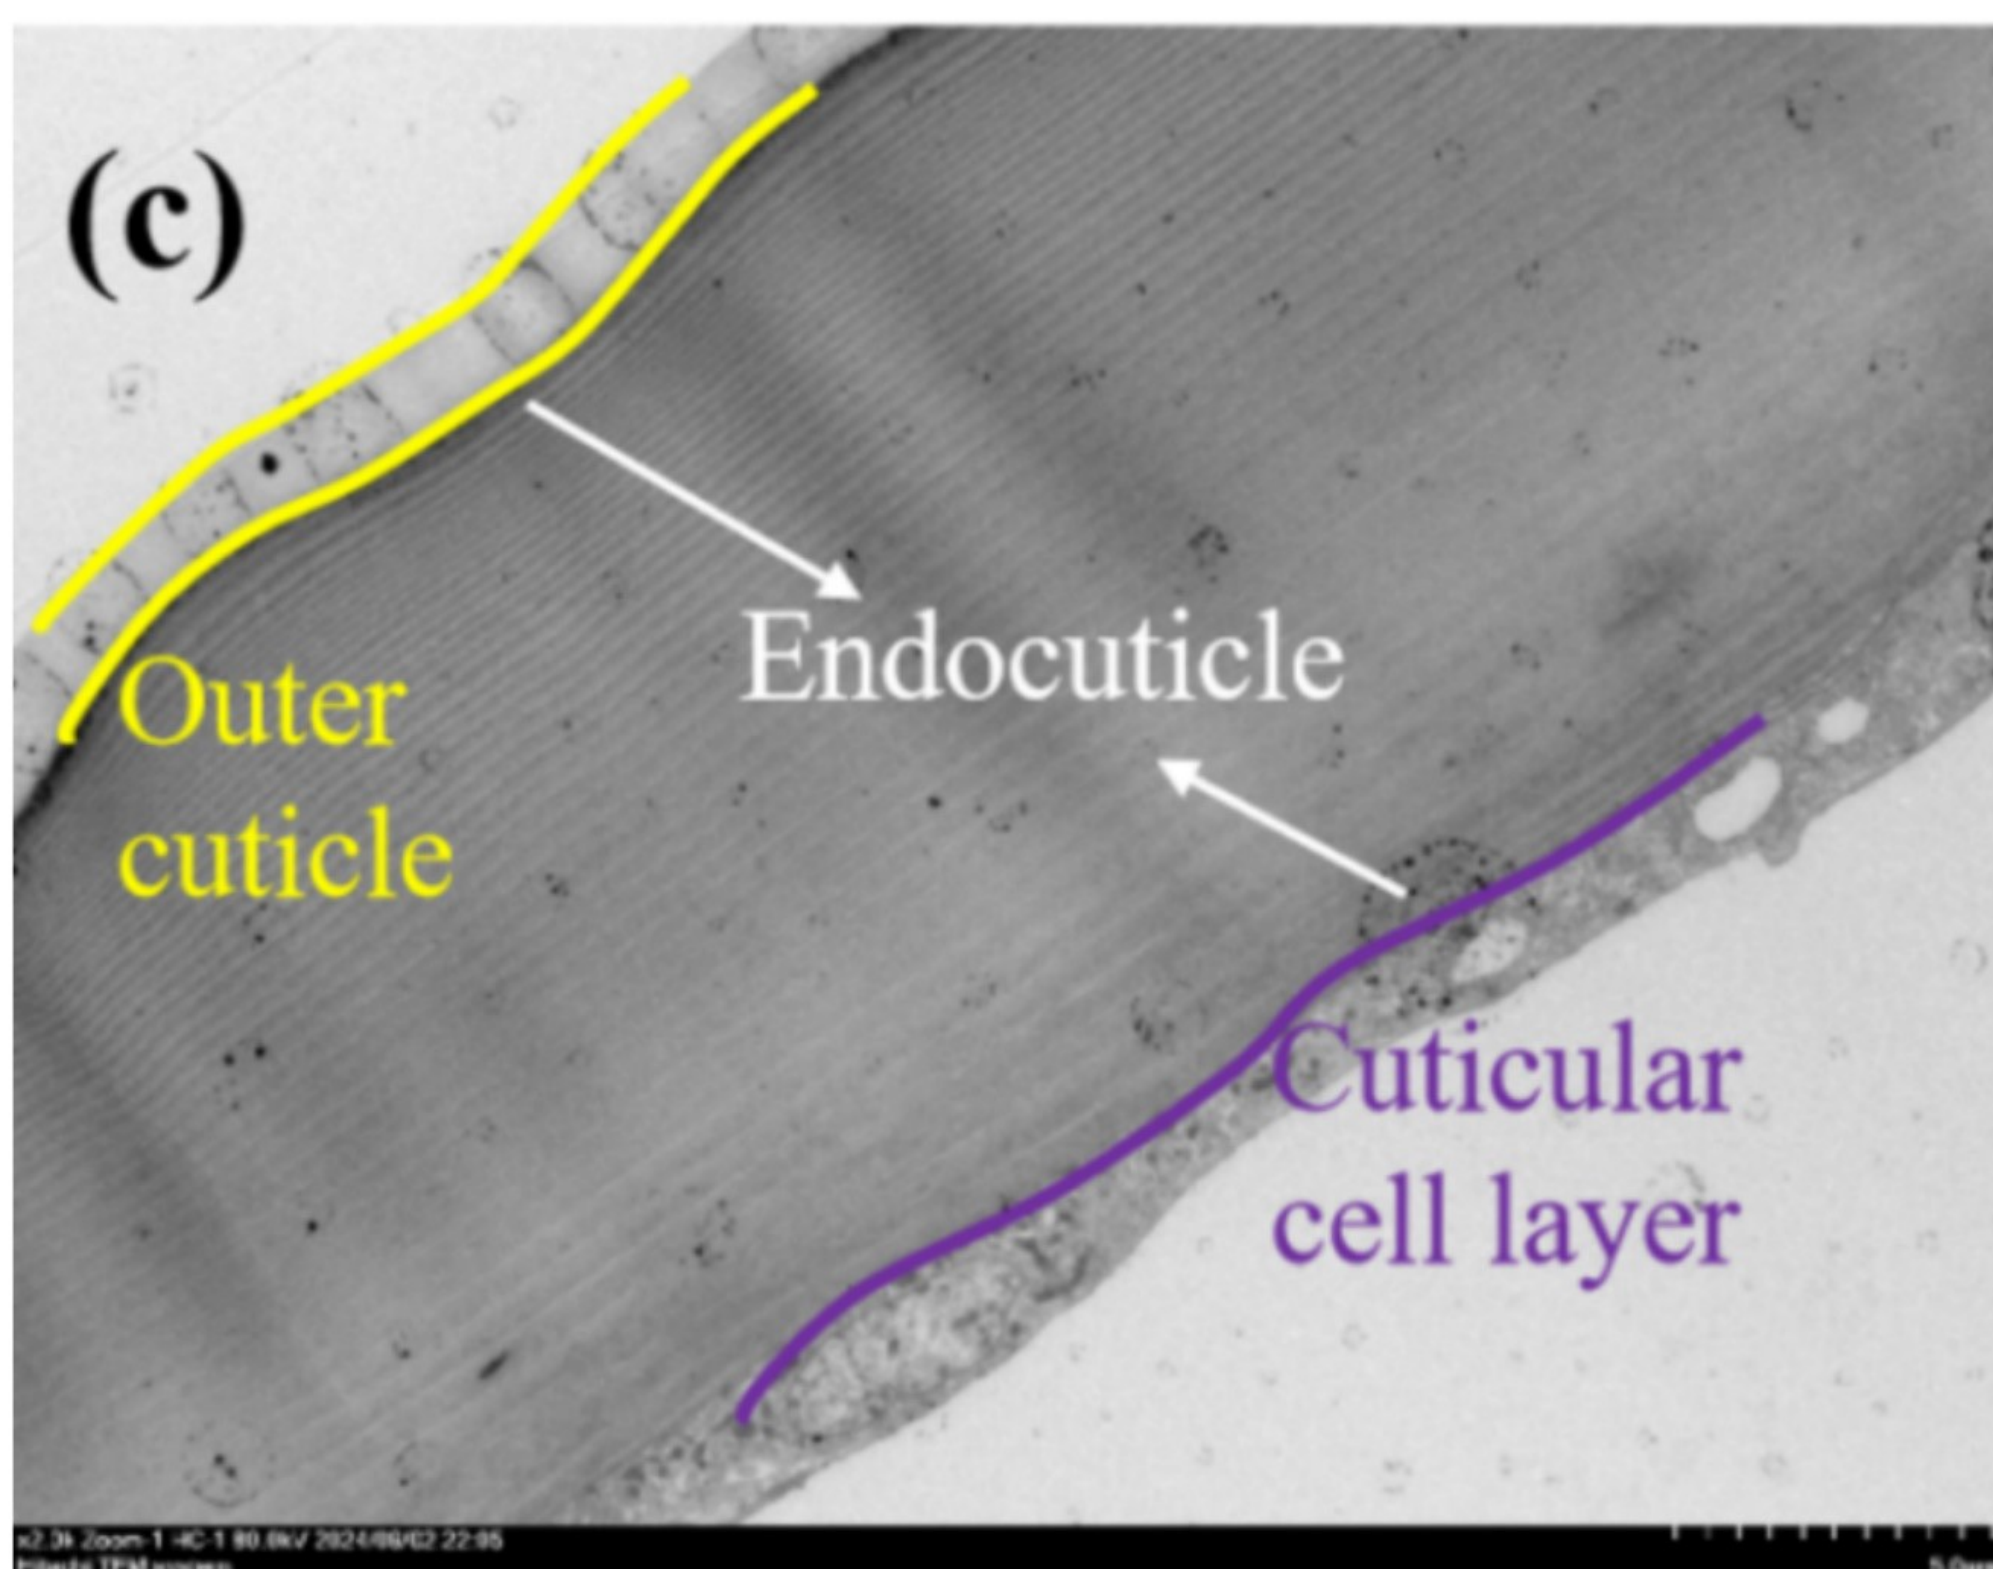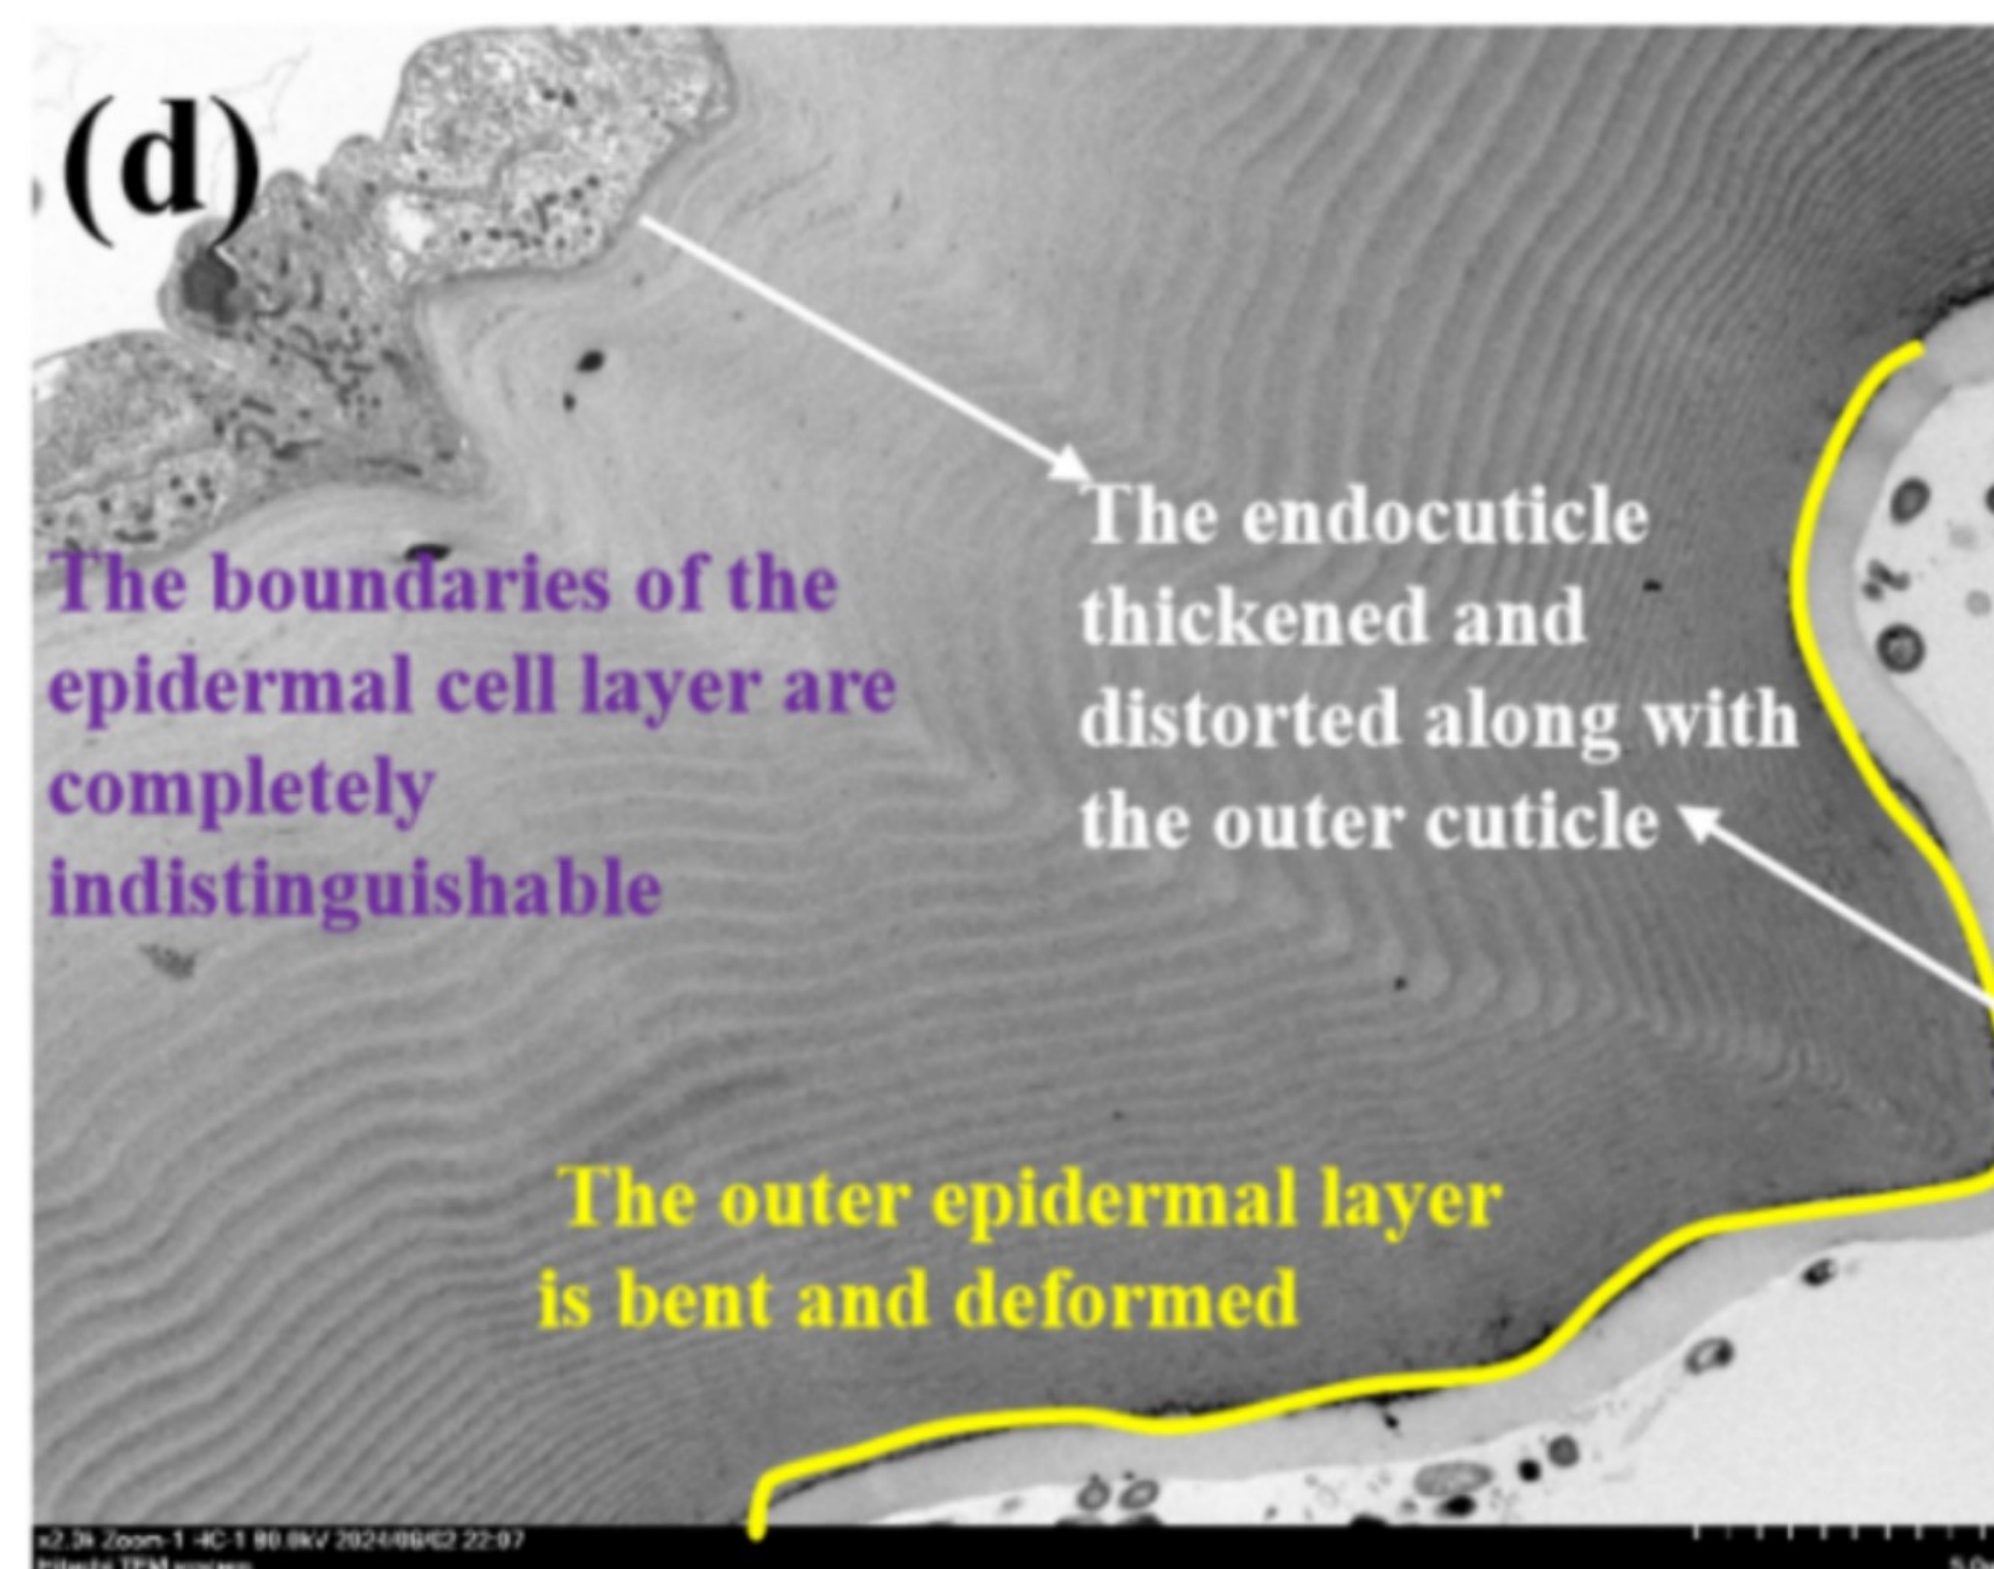

Supplement: d5ew00863h3.pdf [file d5ew00863h3.pdf]

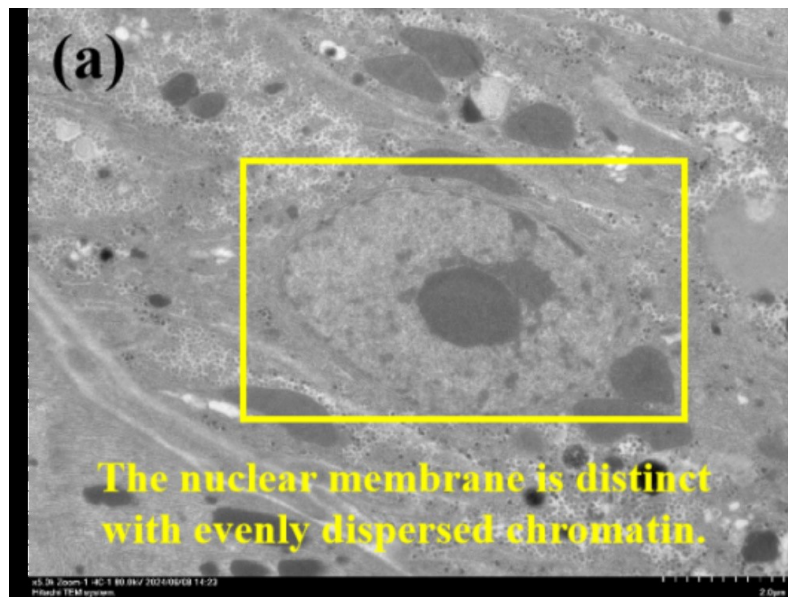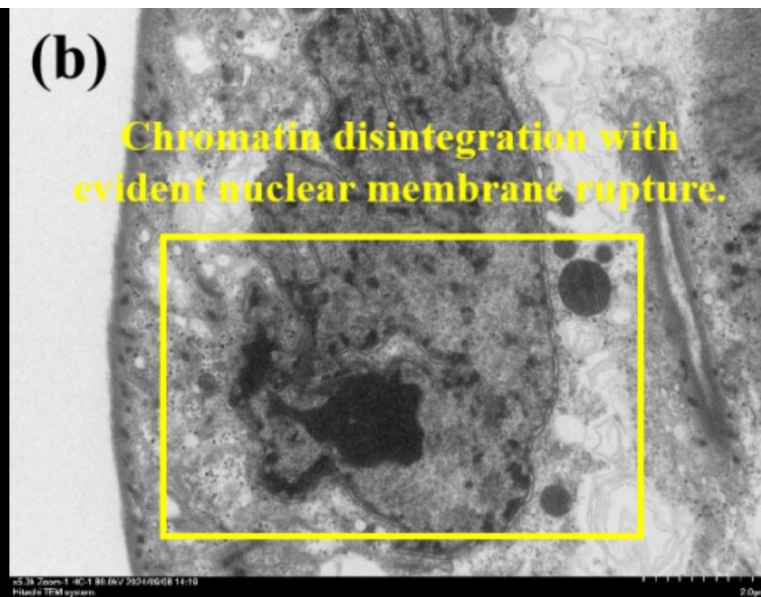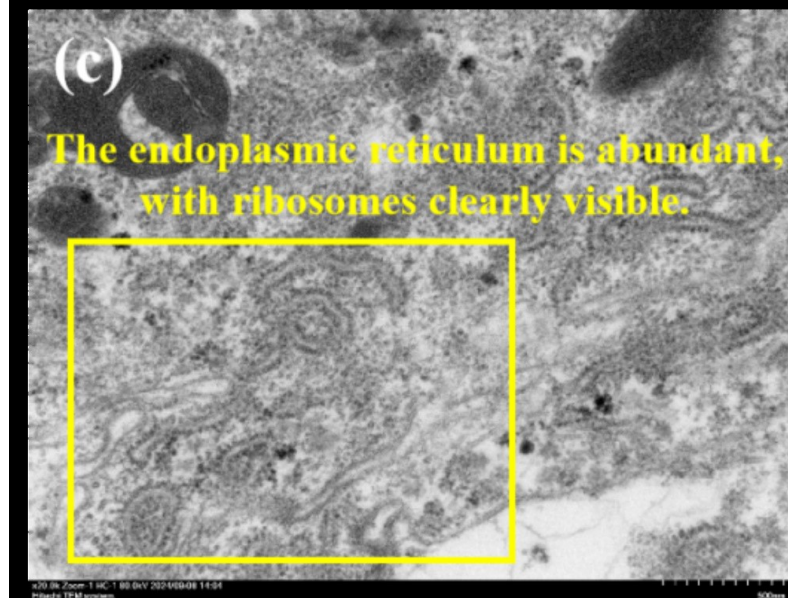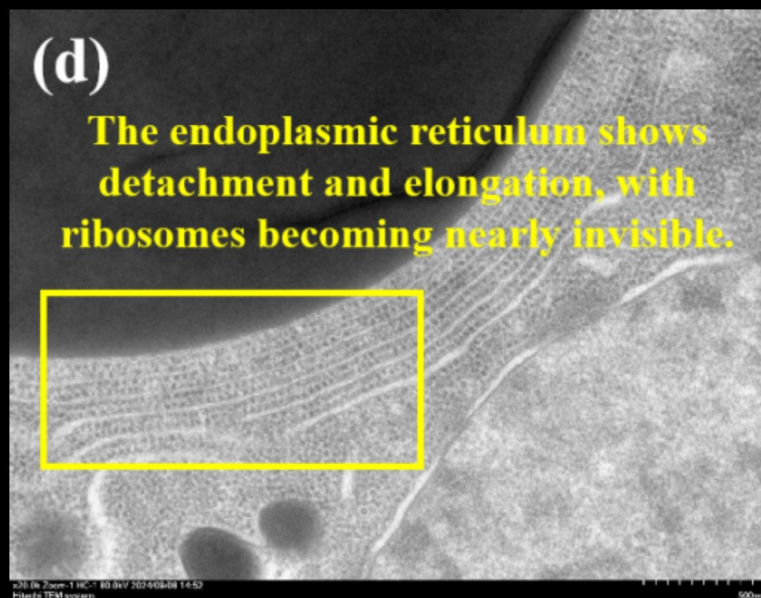

Supplement: d5ew00863h5.pdf [file d5ew00863h5.pdf]

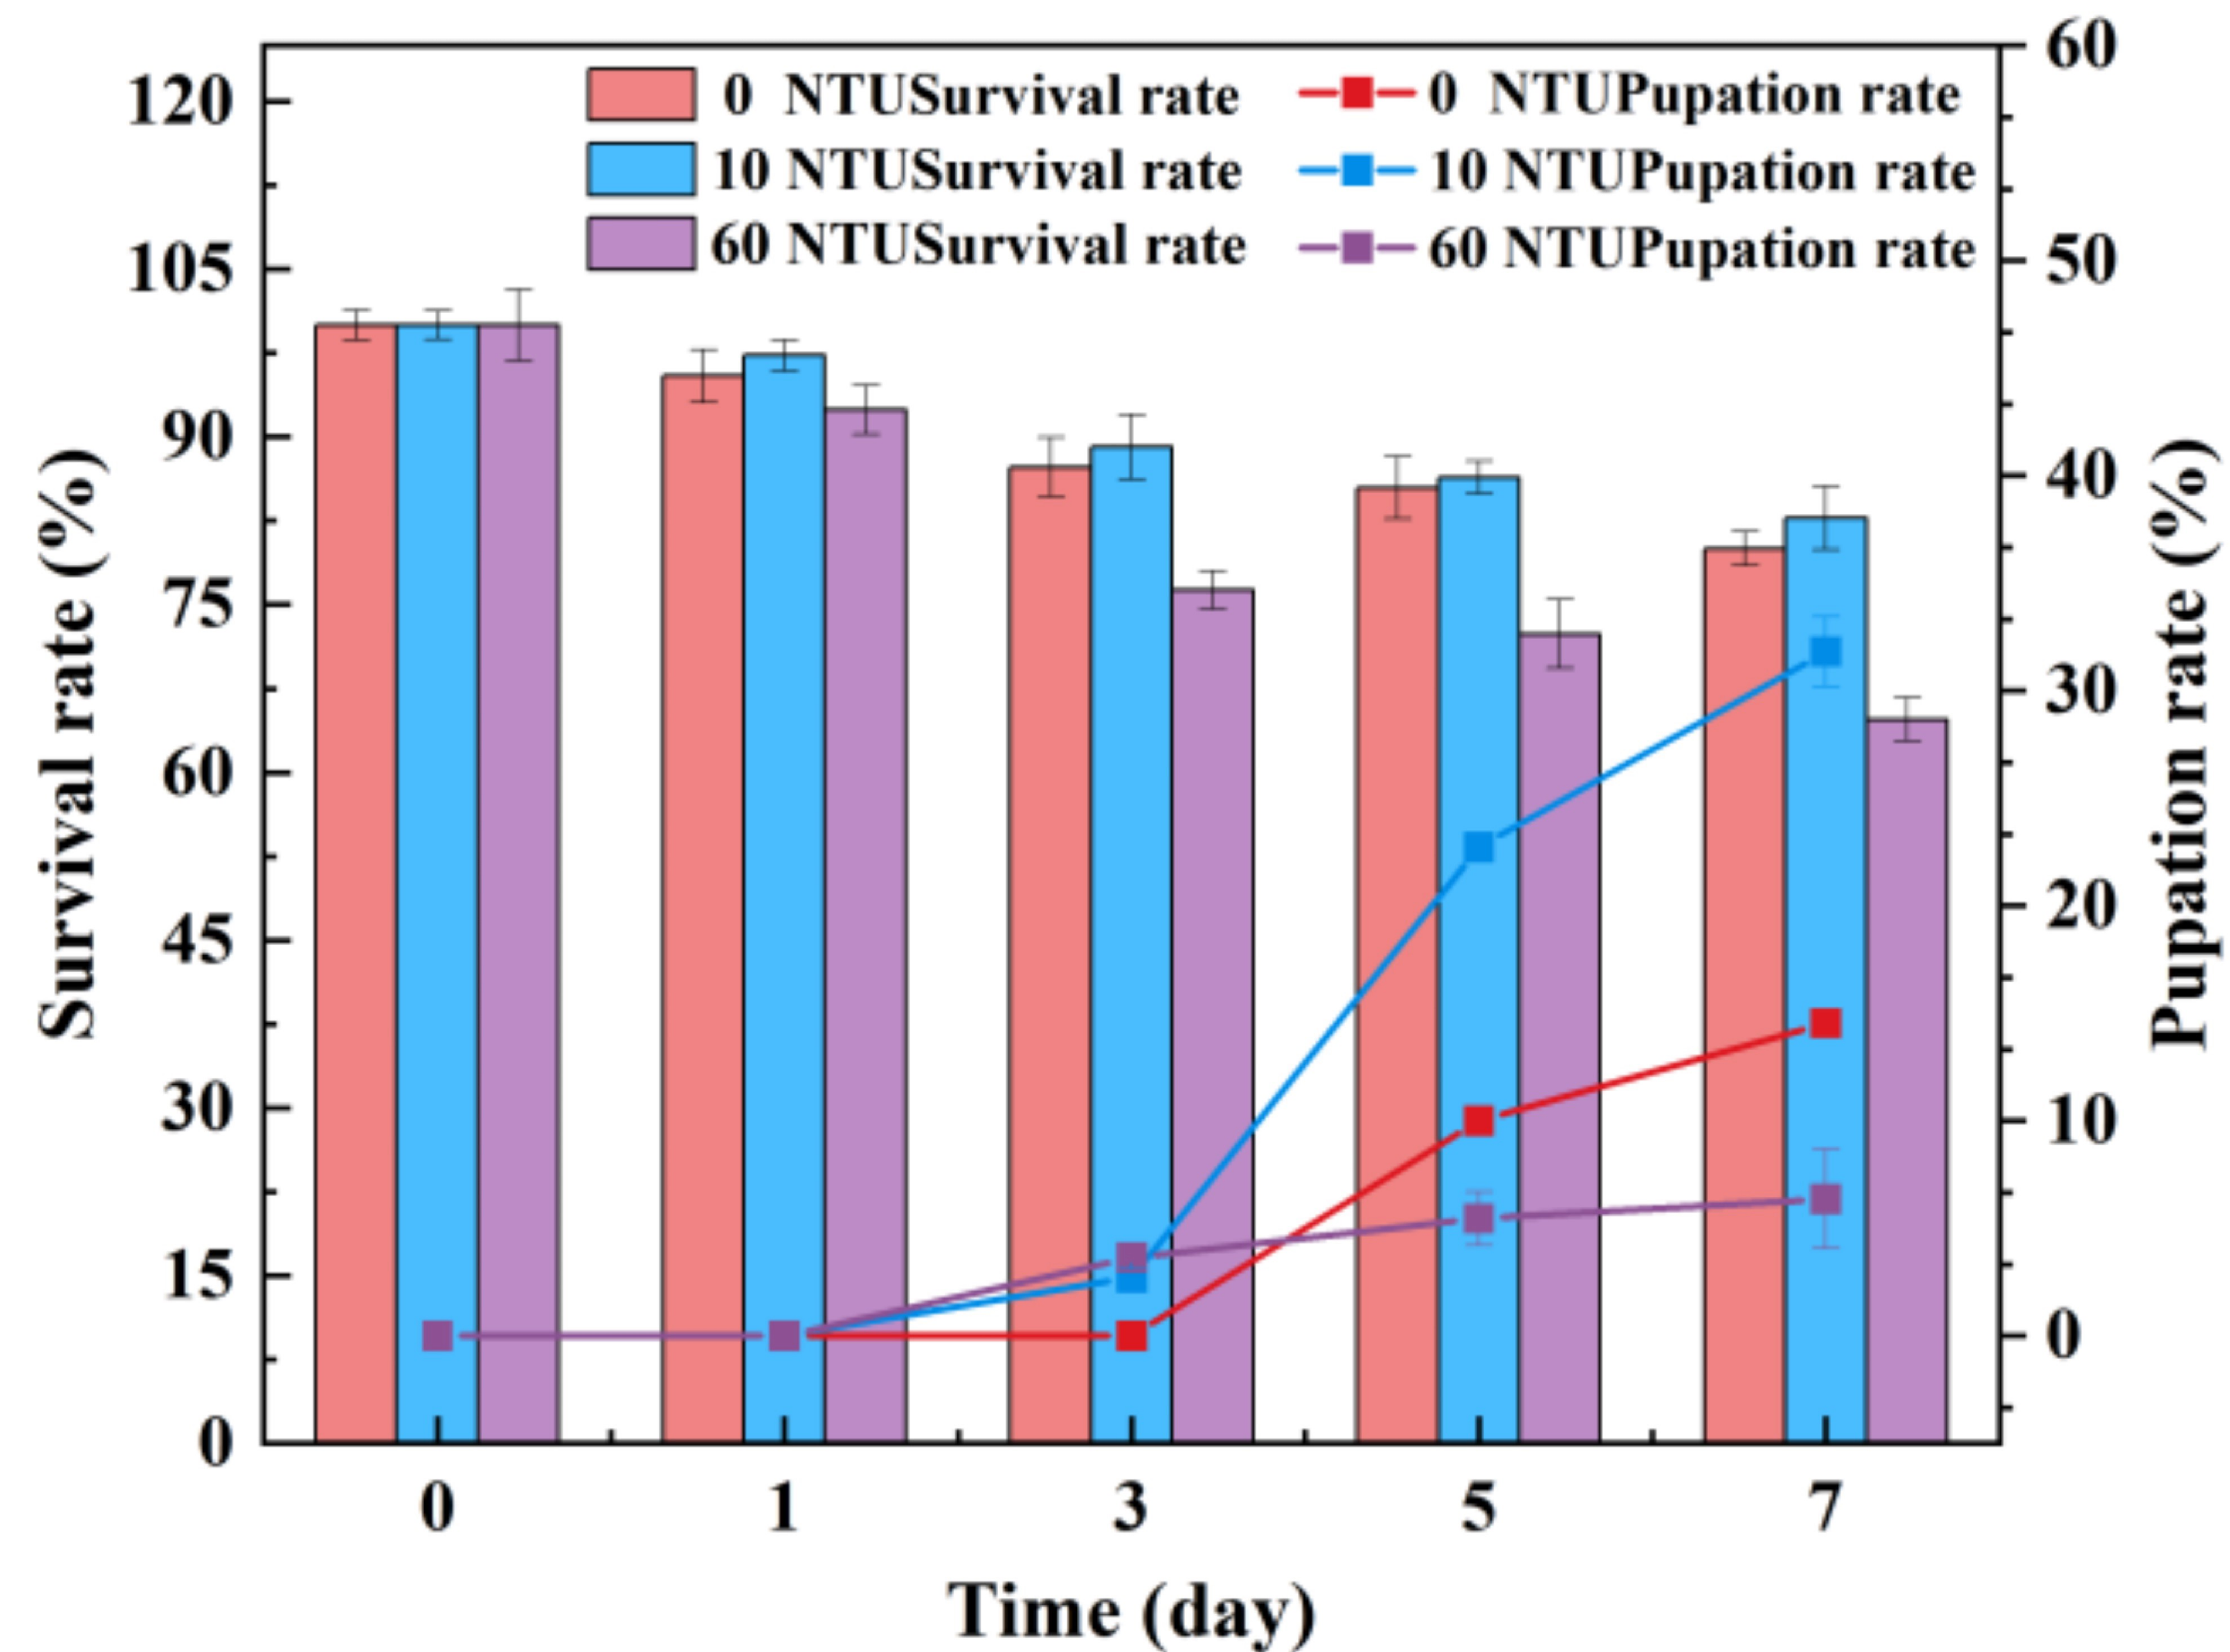

Supplement: d5ew00863h7.pdf [file d5ew00863h7.pdf]

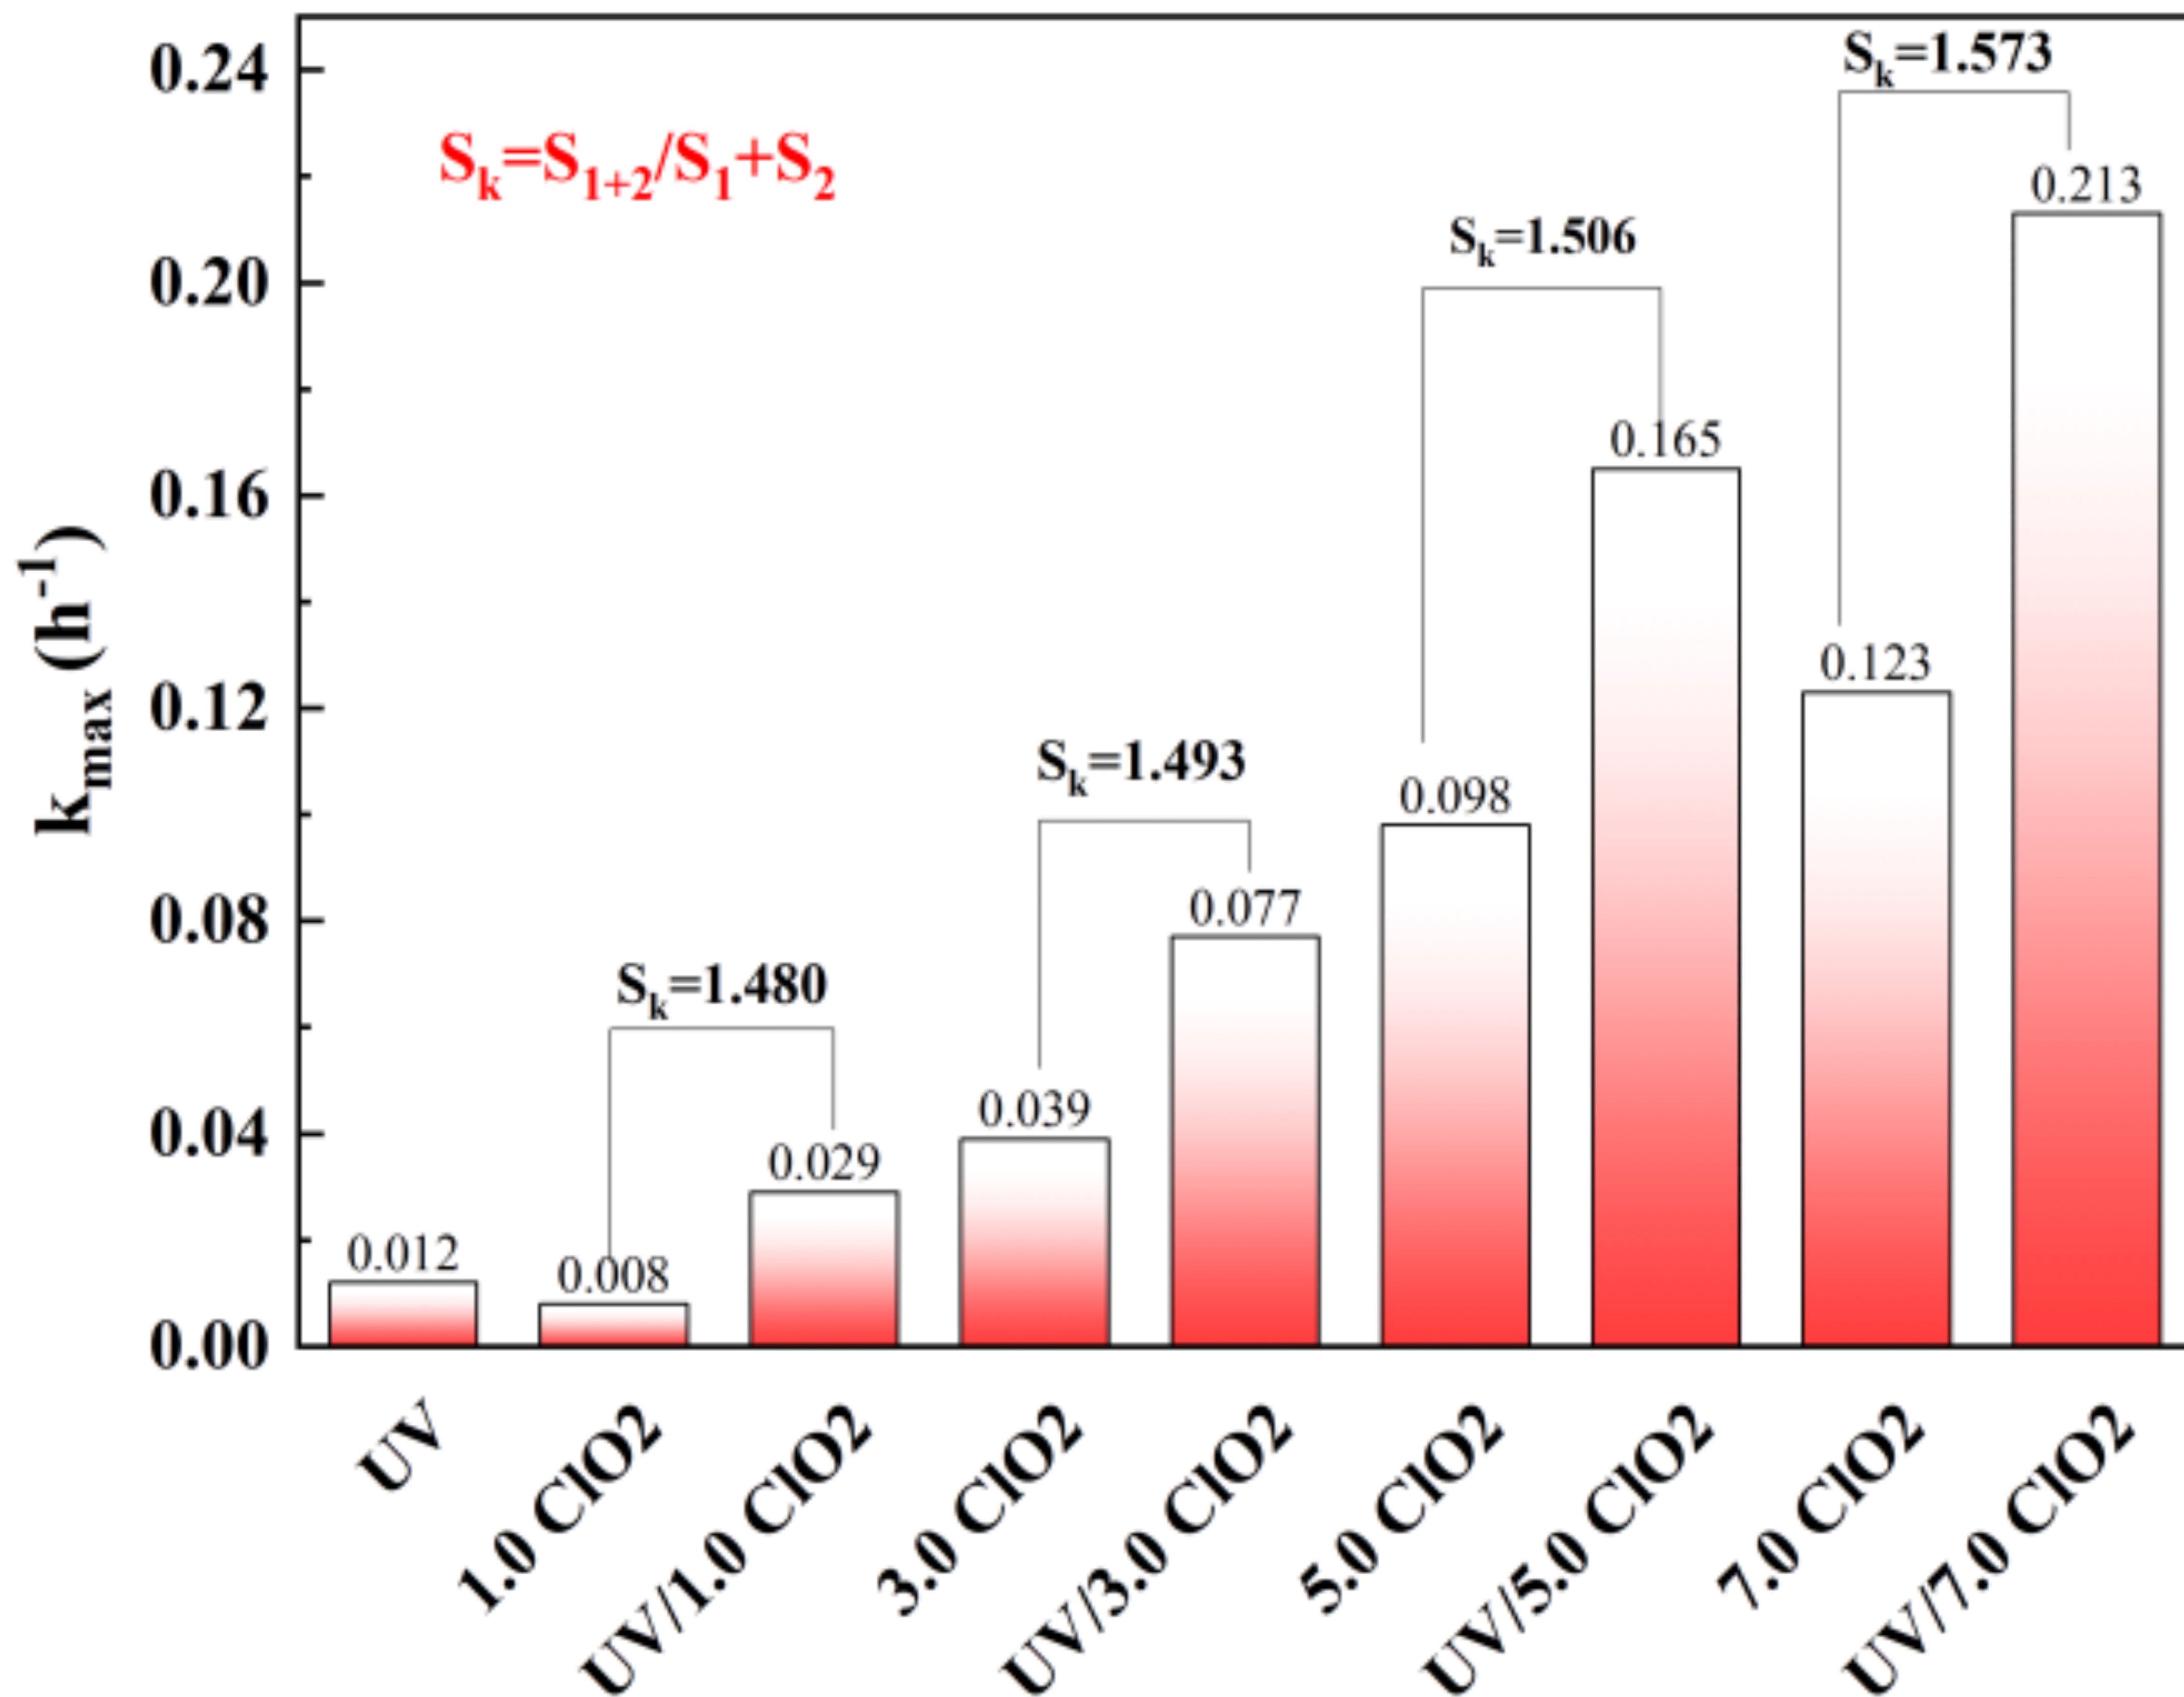

Supplement: d5ew00863h8.pdf [file d5ew00863h8.pdf]
